# Supplementary material for: Biocontrol Ability and Production of Volatile Organic Compounds as a Potential Mechanism of Action of Olive Endophytes against Colletotrichum acutatum
Source: MDPI journal article supplement (doi:10.3390/microorganisms10030571), 2022-03-06
Supplement: s1 [file s1]

## Supplementary material

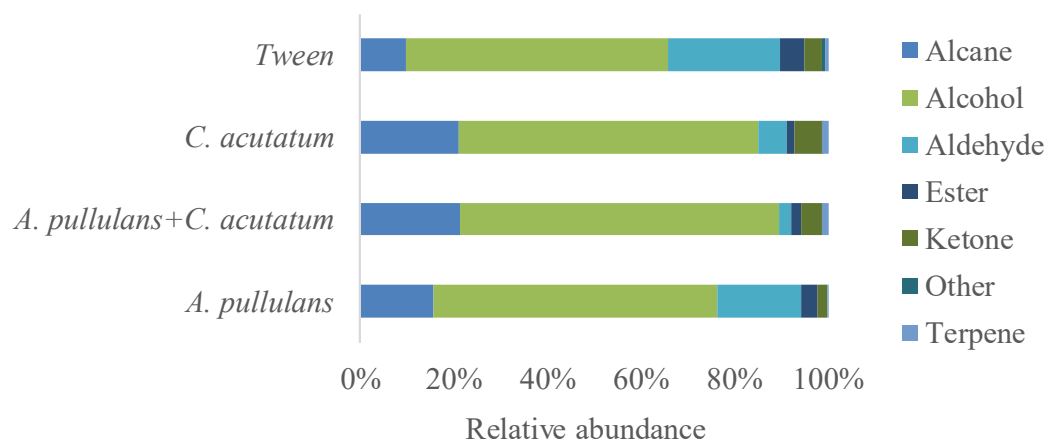

**Figure S1.** Relative abundance (expressed in chromatographic area) of volatile organic compounds per chemical classes identified in olives inoculated with *Aureobasidium pullulans* and *Colletotrichum acutatum* (*A. pullulans* + *C. acutatum*), or inoculated solely with *A. pullulans*, *C. acutatum* or tween (controls).

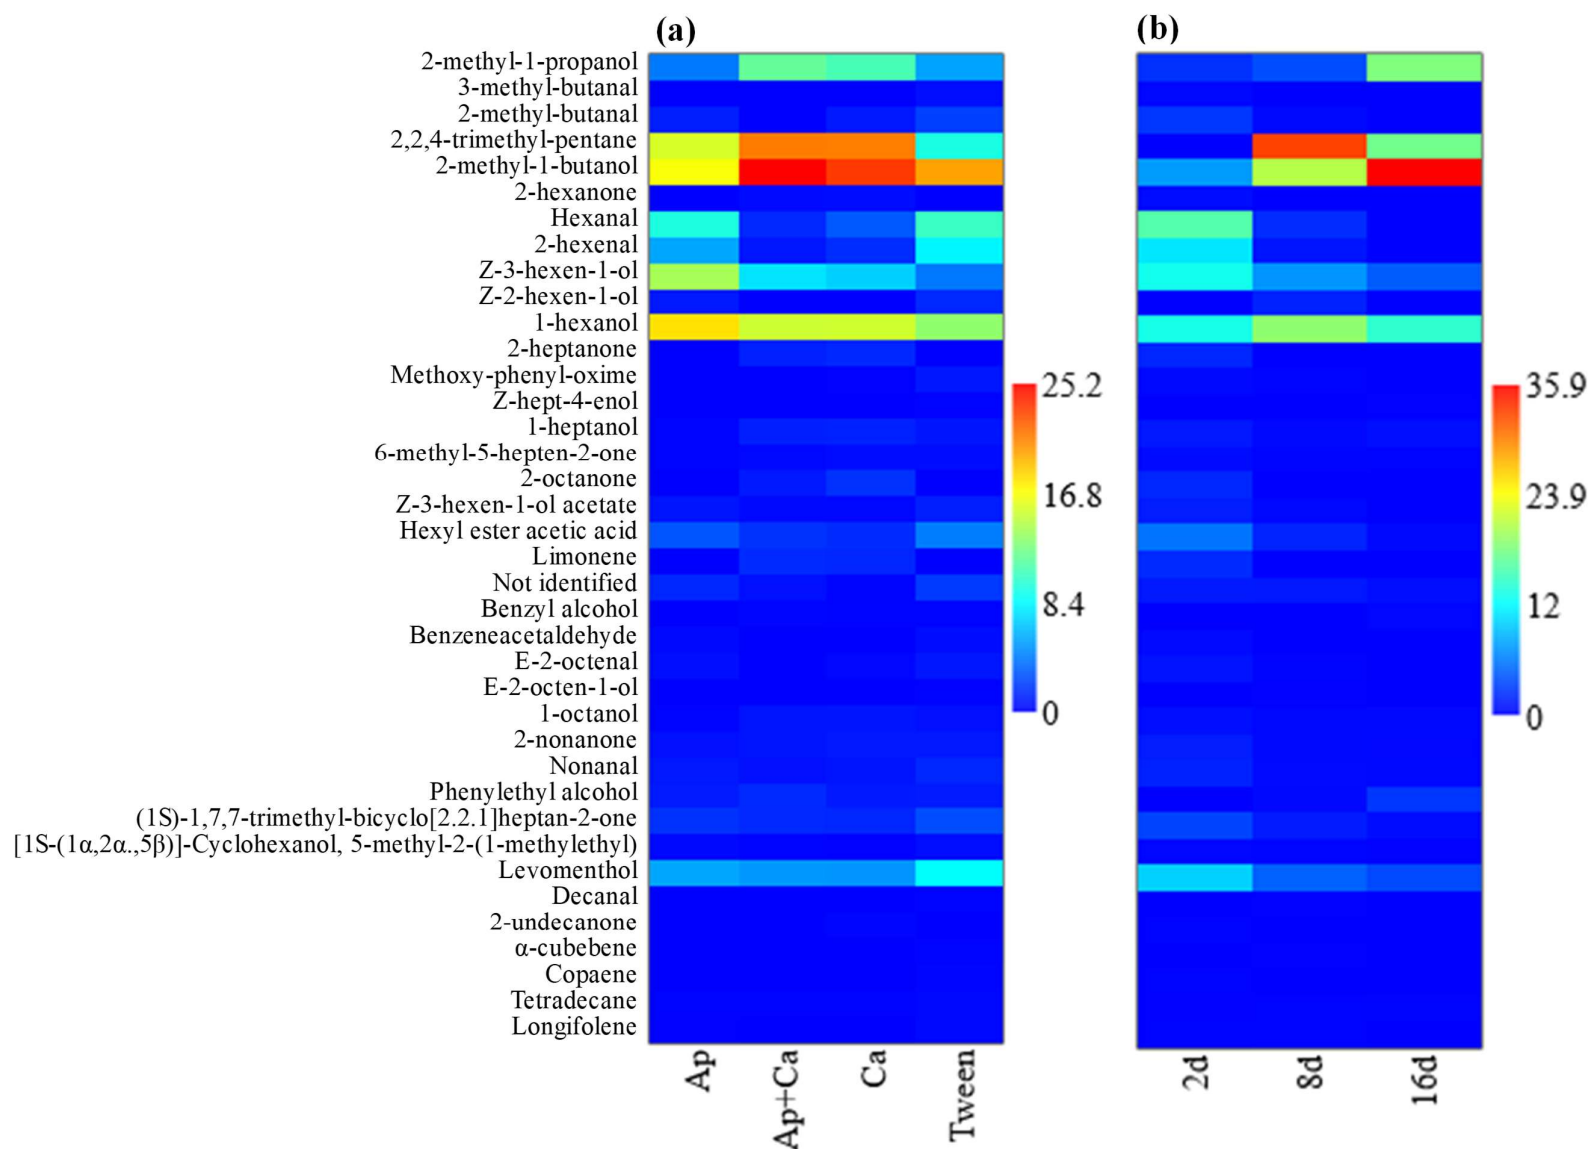

**Figure S2.** Heatmap visualization of volatile compounds identified in olives (a) inoculated with *Aureobasidium pullulans* and *Colletotrichum acutatum* (Ap + Ca), or inoculated solely with *A. pullulans* (Ap), *C. acutatum* (Ca) or tween (controls), (b) after 2-, 8- and 16 days of pathogen inoculation. The color intensity (blue to red) refers to compound abundance in each sample.

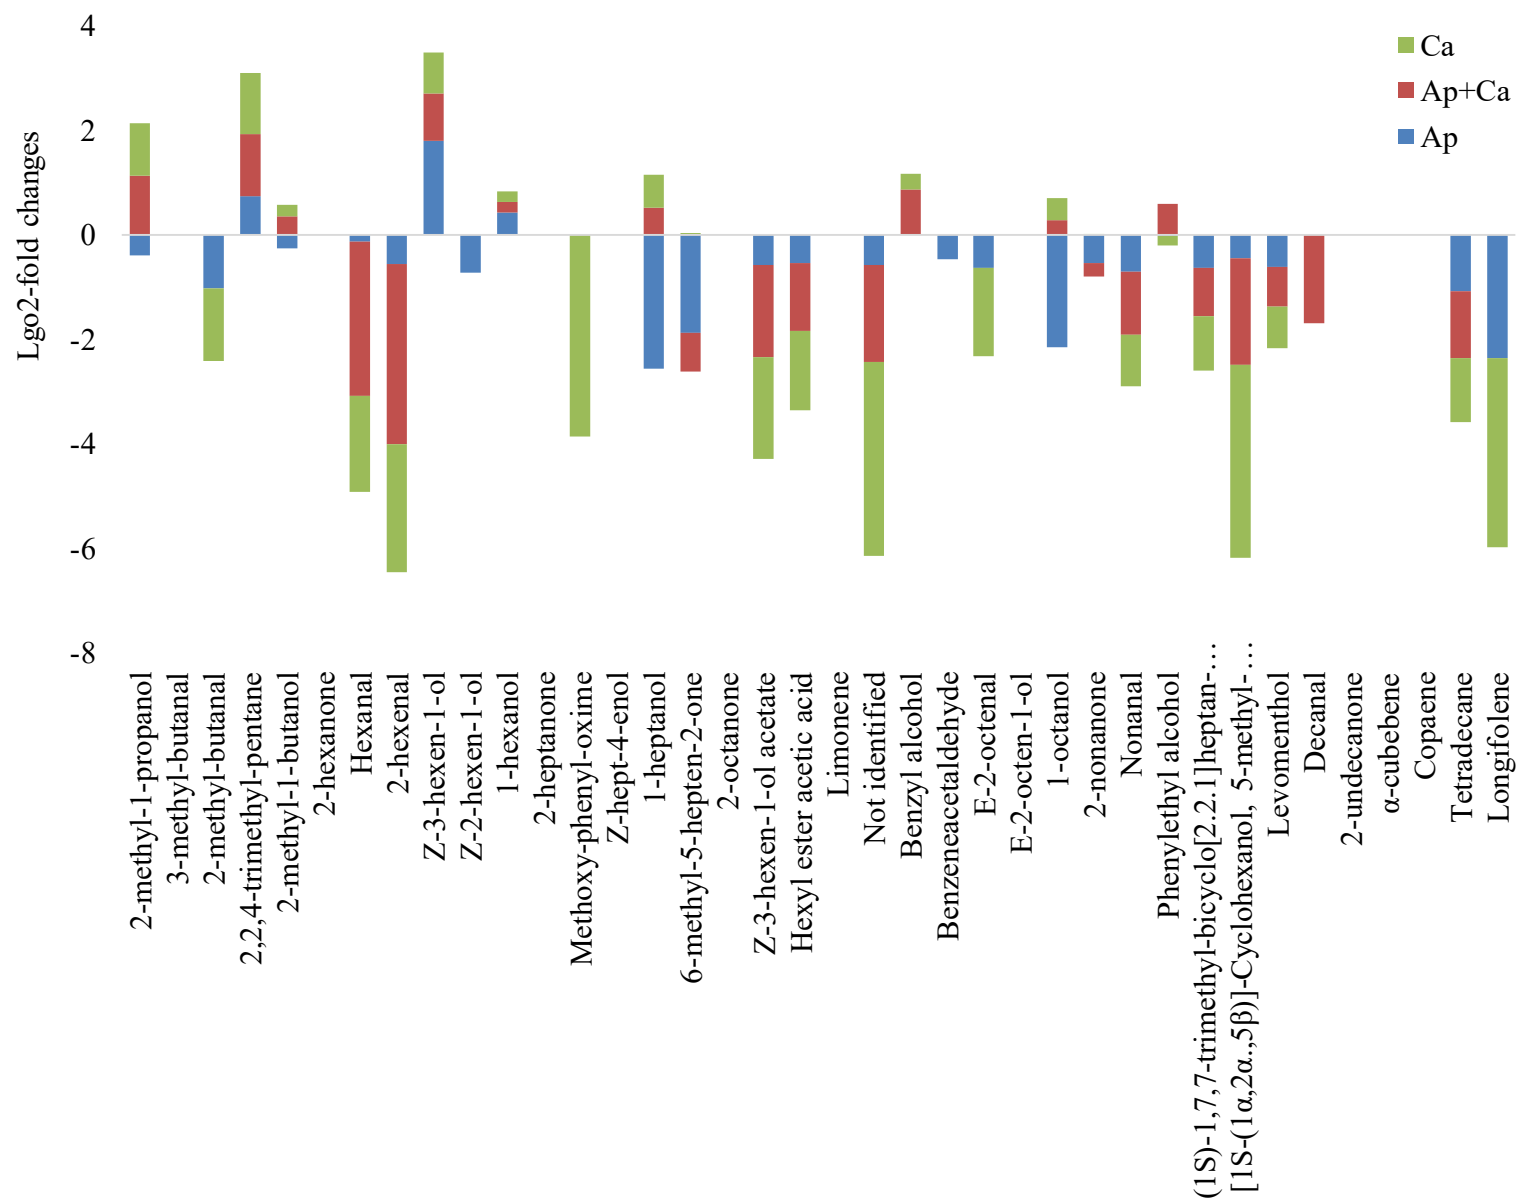

**Figure S3.** Log2-fold changes in the abundance of individual volatile organic compounds in olives inoculated with *Aureobasidium pullulans* and *Colletotrichum acutatum* (Ap + Ca), *A. pullulans* (Ap) or *C. acutatum* (Ca) relative to olives inoculated with tween (control).

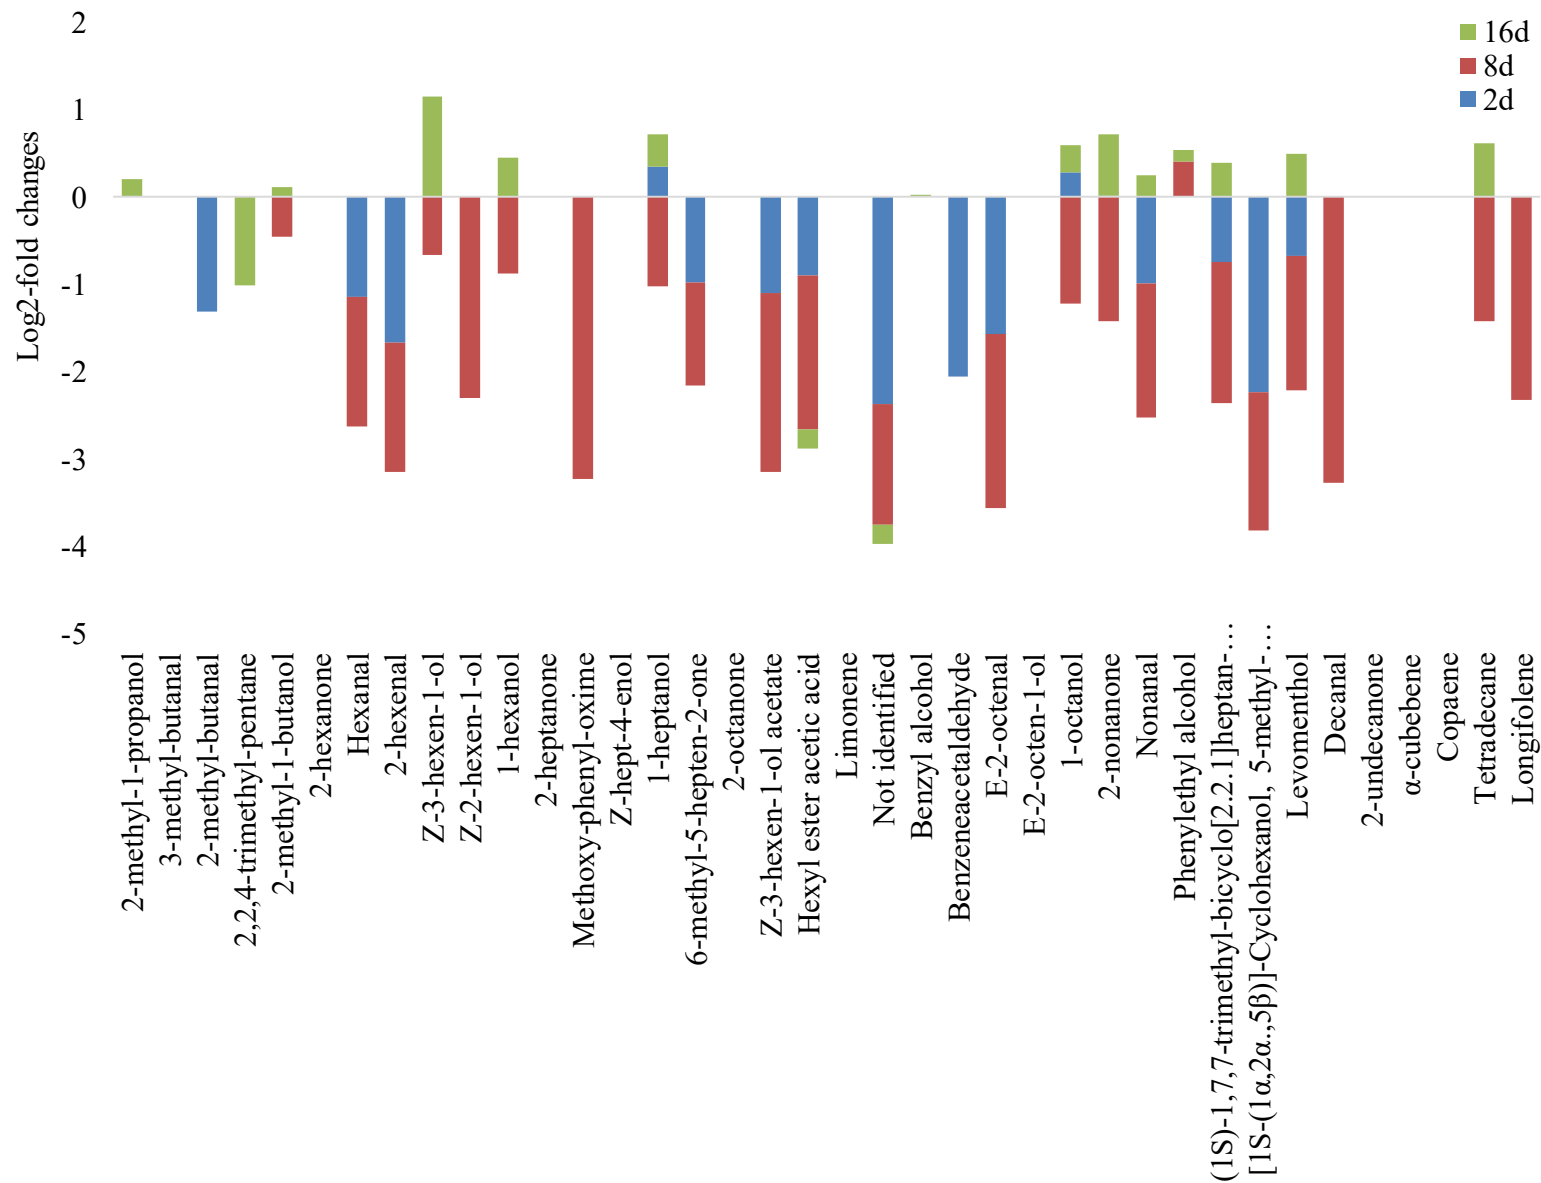

**Figure S4.** Log2-fold changes in the abundance of individual volatile organic in olives after 2-, 8- and 16 days of fungi inoculation relative to olives inoculated with tween (control).

**Table S1.** Volatile compounds detected in this study: retention time (RT). Kovat's retention indices (RI), and selected ions used as m/z identifiers (QI).

| RT<br>(min)     | RIcal <sup>a</sup> | RIlit <sup>b</sup> | Compounds                                                                                   | QI (m/z)  |
|-----------------|--------------------|--------------------|---------------------------------------------------------------------------------------------|-----------|
| <b>Alkane</b>   |                    |                    |                                                                                             |           |
| 4.534           | 690                | 689                | 2,2,4-trimethyl-pentane                                                                     | 56/57/99  |
| 46.824          | 1298               | 1400               | Tetradecane                                                                                 | 43/57/71  |
| <b>Alcohol</b>  |                    |                    |                                                                                             |           |
| 3.516           | 632                | 636                | 2-methyl-1-propanol                                                                         | 41/43/74  |
| 5.696           | 739                | 738                | 2-methyl-1-butanol                                                                          | 41/57/70  |
| 10.404          | 857                | 859                | <i>Z</i> -3-hexen-1-ol                                                                      | 41/67/82  |
| 10.960          | 868                | 863                | <i>Z</i> -2-hexen-1-ol                                                                      | 41/57/82  |
| 11.108          | 870                | 869                | 1-hexanol                                                                                   | 43/56(69  |
| 16.924          | 967                | 968                | <i>Z</i> -hept-4-enol                                                                       | 41/81/96  |
| 17.260          | 972                | 973                | 1-heptanol                                                                                  | 43/56/70  |
| 21.275          | 1030               | -                  | <i>Not identified</i>                                                                       | 43/57/98  |
| 21.487          | 1033               | 1033               | Benzyl alcohol                                                                              | 77/79/108 |
| 24.009          | 1069               | 1055               | <i>E</i> -2-octen-1-ol                                                                      | 41/57/68  |
| 24.226          | 1072               | 1068               | 1-octanol                                                                                   | 41/56/70  |
| 27.038          | 1109               | 1114               | Phenylethyl alcohol                                                                         | 65/91/122 |
| 30.837          | 1165               | 1165               | [1 <i>S</i> -(1 $\alpha$ ,2 $\alpha$ ,5 $\beta$ )]-Cyclohexanol, 5-methyl-2-(1-methylethyl) | 71/95/123 |
| 31.386          | 1165               | 1165               | Levomenthol                                                                                 | 71/81/95  |
| <b>Aldehyde</b> |                    |                    |                                                                                             |           |
| 3.925           | 663                | 665                | 3-methyl-butanal                                                                            | 44/58/71  |
| 4.055           | 670                | 671                | 2-methyl-butanal                                                                            | 29/41/57  |
| 7.816           | 797                | 798                | Hexanal                                                                                     | 44/56/82  |
| 10.226          | 854                | 853                | 2-hexanal                                                                                   | 41/69/83  |
| 22.159          | 1043               | 1043               | Benzeneacetaldehyde                                                                         | 65/91/120 |
| 23.218          | 1058               | 1062               | <i>E</i> -2-octenal                                                                         | 41/55/70  |
| 26.532          | 1101               | 1102               | Nonanal                                                                                     | 41/57/98  |
| 33.733          | 1203               | 1203               | Decanal                                                                                     | 43/70/112 |

| Ester   |      |                  |                                                 |             |
|---------|------|------------------|-------------------------------------------------|-------------|
| 19.762  | 1006 | 1009             | Z-3-hexen-1-ol, acetate                         | 43/67/82    |
| 20.221  | 1013 | 1012             | Hexyl ester acetic acid                         | 43/56/84    |
| Ketone  |      |                  |                                                 |             |
| 7.459   | 789  | 787              | 2-hexanone                                      | 43/58/100   |
| 12.254  | 889  | 889              | 2-heptanone                                     | 43/58/71    |
| 18.338  | 986  | 986              | 6-methyl-5-hepten-2-one                         | 43/69/108   |
| 18.603  | 990  | 991              | 2-octanone                                      | 43/58/71    |
| 25.678  | 1090 | 1091             | 2-nonanone                                      | 43/58/71    |
| 29.277  | 1143 | 1143             | (1S)-1,7,7-trimethyl-bicyclo[2.2.1]heptan-2-one | 41/95/152   |
| 39.817  | 1292 | 1291             | 2-undecanone                                    | 43/58/71    |
| Terpene |      |                  |                                                 |             |
| 21.202  | 1029 | 1031             | Limonene                                        | 68/93/136   |
| 45.283  | 1375 | 1376             | $\alpha$ -cubebene                              | 105/119/161 |
| 45.363  | 1377 | 1377             | Copaene                                         | 105/119/161 |
| 47.192  | 1403 | 1403             | Longifolene                                     | 94/161/189  |
| Other   |      |                  |                                                 |             |
| 13.122  | 903  | 901 <sup>c</sup> | Methoxy-phenyl-oxime                            | 77/133/151  |

<sup>a</sup>R<sub>l</sub>calc: retention indices calculated from C8 to C20 n-linear alkanes with TRB-5MS capillary column.

<sup>b</sup>R<sub>l</sub>lit: retention indices reported in the literature for TRB-5MS capillary column or equivalent.

Identification method: Compounds were identified by comparing the MS fragmentation pattern with those of STD and mass spectra database performed using NIST Standard Reference Database 69, PubChem Compound Summary and ChemSpider database. Considering fit and retrofit values >80 %.

<sup>c</sup>Chung et al. (2021)

**Table S2** Relative importance of the treatment (olives inoculated with *Colletotrichum acutatum* or *Aureobasidium pullulans*, or *A. pullulans* + *C. acutatum*) and time of microbial interaction (2, 8 and 16 days), on volatile composition as revealed by permutational multivariate analysis of variance (PERMANOVA).

| Variable      | DF | SS     | F-statistics | R <sup>2</sup> | P value |
|---------------|----|--------|--------------|----------------|---------|
| Treatments    | 3  | 1.2440 | 5.264        | 0.130          | 0.001   |
| Sampling time | 1  | 4.0262 | 51.116       | 0.420          | 0.001   |
| Residuals     | 55 | 4.3321 |              | 0.451          |         |
| Total         | 59 | 9.6023 |              | 1.000          |         |

Legend: DF - degrees of freedom; SS - sum of squares

## References

Chung, M.; Cheng, S.; Lin, C.; Chang, S. Profiling of volatile compounds with characteristic odors in *Bambusa oldhamii* shoots from Taiwan. *BioResources* **2021**, 16(3), 5901-5914.
